# Supplementary material
Source: ML conference proceedings conference paper supplement (https://openaccess.thecvf.com/content/CVPR2024/html/Bandyopadhyay_SketchINR_A_First_CVPR_2024_paper.html)
Supplement: Supplementary file 1 [file Bandyopadhyay_SketchINR_A_First_CVPR_2024_supplemental.pdf]

## Supplementary Material

### ***SketchINR: A First Look into Sketches as Implicit Neural Representations***

Hmrishav Bandyopadhyay<sup>1</sup> Ayan Kumar Bhunia<sup>1</sup> Pinaki Nath Chowdhury<sup>1</sup> Aneeshan Sain<sup>1</sup>  
Tao Xiang<sup>1,2</sup> Timothy Hospedales<sup>3</sup> Yi-Zhe Song<sup>1,2</sup>

<sup>1</sup>SketchX, CVSSP, University of Surrey, United Kingdom.

<sup>2</sup>iFlyTek-Surrey Joint Research Centre on Artificial Intelligence.

<sup>3</sup>University of Edinburgh, United Kingdom

{h.bandyopadhyay, a.bhunias, p.chowdhury, a.sain, t.xiang, y.song}@surrey.ac.uk  
t.hospedales@ed.ac.uk

**More on inference time calculations:** We present two primary models: one trained with latent vectors and the other as a VAE. While the latter works well with sketches from *Vector-MNIST* and *Quick-Draw!*, we use learned latent vectors (in Tab. 1) for more complex datasets like *FS-COCO* and *Sketchy* (having  $\sim 3000$  and  $\sim 600$  number of stroke points, respectively). For a fair comparison in Tab. 1, we evaluate against (i) the “Decoder only” model of Sketch-RNN and (ii) only the decoder from CoSE. Methods like BézierSketch [1] and SketchODE [2] are trained in a per-sketch optimisation setting as ours. We compute the inference time for all methods, as time taken to decode a sketch from its latent representation. We particularly emphasise on SketchINR’s scalability to very complex sketches in *FS-COCO*, where even per-sample optimisation versions of BézierSketch and SketchODE fail considerably.

### References

- [1] Ayan Das, Yongxin Yang, Timothy Hospedales, Tao Xiang, and Yi-Zhe Song. Béziersketch: A generative model for scalable vector sketches. In *ECCV*, 2020. 1
- [2] Ayan Das, Yongxin Yang, Timothy Hospedales, Tao Xiang, and Yi-Zhe Song. Sketchode: Learning neural sketch representation in continuous time. In *ICLR*, 2021. 1
